# Supplementary material
Source: HighWire-hosted journal article supplement (https://gpsych.bmj.com/content/35/2/e100748)
Supplement: inline-supplementary-material-1 [file inline-supplementary-material-1.pdf]

## SUPPLEMENTARY MATERIALS

**Supplementary Material (Table-S1)** for comparisons of the CHR individuals, who lost follow-up and those who completed follow-up.

**Table S1.** Baseline demographic, clinical and niacin-induced flushing response variables, comparison between who lost follow-up and those who completed follow-up.

| Variables                      | Lost        | Followed up | Comparison     |           |
|--------------------------------|-------------|-------------|----------------|-----------|
|                                |             |             | $t/\chi^2/Z$   | $P$ value |
| Cases (n)                      | 21          | 84          | -              | -         |
| Demographic variables          |             |             |                |           |
| Age (years)[mean (S.D.)]       | 17.7 (3.8)  | 18.4 (5.0)  | $t=0.622$      | 0.535     |
| Male[n (%)]                    | 9 (42.9)    | 37 (44.0)   | $\chi^2=0.010$ | 0.922     |
| Female[n (%)]                  | 12 (57.1)   | 47 (56.0)   |                |           |
| Education (years)[mean (S.D.)] | 9.5 (1.9)   | 10.6 (2.9)  | $t=1.586$      | 0.116     |
| Height[mean (S.D.)] cm         | 170.0 (9.8) | 166.4 (7.4) | $t=1.881$      | 0.063     |
| Weight[mean (S.D.)] kg         | 61.3 (14.6) | 57.2 (10.4) | $t=1.450$      | 0.150     |
| BMI (kg/m <sup>2</sup> )       | 21.1 (3.9)  | 20.6 (3.3)  | $t=0.533$      | 0.595     |
| SIPS variables                 |             |             |                |           |
| Before GAF[mean (S.D.)]        | 78.7 (4.3)  | 79.2 (2.9)  | $t=0.638$      | 0.525     |
| Now GAF[mean (S.D.)]           | 56.1 (5.7)  | 56.8 (5.8)  | $t=0.451$      | 0.653     |
| GAF drop[mean (S.D.)]          | 22.8 (5.9)  | 22.1 (5.4)  | $t=0.546$      | 0.587     |
| SIPS_P                         | 10.7 (3.1)  | 10.4 (3.6)  | $t=0.265$      | 0.791     |
| SIPS_N                         | 12.4 (6.5)  | 12.0 (5.5)  | $t=0.219$      | 0.827     |
| SIPS_D                         | 6.4 (3.0)   | 6.5 (2.7)   | $t=0.280$      | 0.780     |
| SIPS_G                         | 9.2 (3.9)   | 9.7 (2.4)   | $t=0.543$      | 0.592     |

|                                  |             |            |           |              |
|----------------------------------|-------------|------------|-----------|--------------|
| SIPS_TOTAL [Median, Mean (S.D.)] | 39.2 (12.5) | 37.7 (9.4) | $t=0.548$ | 0.585        |
| Niacin-induced flushing response |             |            |           |              |
| Score at 0.0001M AMN at 5min     | 0.1(0.2)    | 0(0)       | $t=1.000$ | 0.329        |
| Score at 0.001M AMN at 5min      | 0.2(0.5)    | 0.3(0.5)   | $t=0.634$ | 0.528        |
| Score at 0.01M AMN at 5min       | 0.5(0.7)    | 1(0.9)     | $t=2.439$ | <b>0.016</b> |
| Score at 0.1M AMN at 5min        | 0.8(0.9)    | 1.6(1.0)   | $t=3.205$ | <b>0.002</b> |
| Score at 0.0001M AMN at 10min    | 0.1(0.4)    | 0.1(0.4)   | $t=0.132$ | 0.895        |
| Score at 0.001M AMN at 10min     | 0.6(1.1)    | 1.1(1.5)   | $t=1.358$ | 0.177        |
| Score at 0.01M AMN at 10min      | 1.3(1.1)    | 1.9(0.7)   | $t=2.153$ | <b>0.042</b> |
| Score at 0.1M AMN at 10min       | 1.9(1.0)    | 2.5(0.7)   | $t=3.408$ | <b>0.001</b> |
| Score at 0.0001M AMN at 15min    | 0.2(0.4)    | 0.3(0.5)   | $t=0.589$ | 0.557        |
| Score at 0.001M AMN at 15min     | 0.9(1.1)    | 1.4(0.8)   | $t=2.261$ | <b>0.032</b> |
| Score at 0.01M AMN at 15min      | 1.8(0.9)    | 2.1(0.7)   | $t=1.376$ | 0.181        |
| Score at 0.1M AMN at 15min       | 2.2(0.7)    | 2.8(0.5)   | $t=3.713$ | <b>0.001</b> |
| Score at 0.0001M AMN at 20min    | 0.2(0.5)    | 0.3(0.6)   | $t=0.497$ | 0.071        |
| Score at 0.001M AMN at 20min     | 1.1(1.0)    | 1.6(0.8)   | $t=2.527$ | <b>0.013</b> |
| Score at 0.01M AMN at 20min      | 2.0(0.8)    | 2.2(0.7)   | $t=1.463$ | 0.146        |
| Score at 0.1M AMN at 20min       | 2.4(0.7)    | 2.9(0.4)   | $t=3.050$ | <b>0.006</b> |

Note: AMN, aqueous methyl nicotinate; BMI, body mass index; GAF drop, GAF (Global Assessment of Functioning) score baseline from highest in the past year; SIPS, the Structured Interview for Prodromal Syndromes; SIPS\_P, scores of positive symptoms scale in SIPS; SIPS\_N, scores of Negative symptoms scale in SIPS; SIPS\_D, scores of disorganization symptoms scale in SIPS; SIPS\_G, scores of general symptoms scale in SIPS; SIPS\_TOTAL, total scores of SIPS;  $t/\chi^2$ :  $t$  for independent t test,  $\chi^2$  for kappa test.
